# Supplementary material for: Tumor suppressor BTG1 promotes PRMT1-mediated ATF4 function in response to cellular stress
Source: PubMed Central journal article supplement (PMC4823095; doi:10.18632/oncotarget.6519), 2015-12-09
Supplement: oncotarget-07-3128-s001.pdf [file oncotarget-07-3128-s001.pdf]

## Tumor suppressor BTG1 promotes PRMT1-mediated ATF4 function in response to cellular stress

### Supplementary Materials

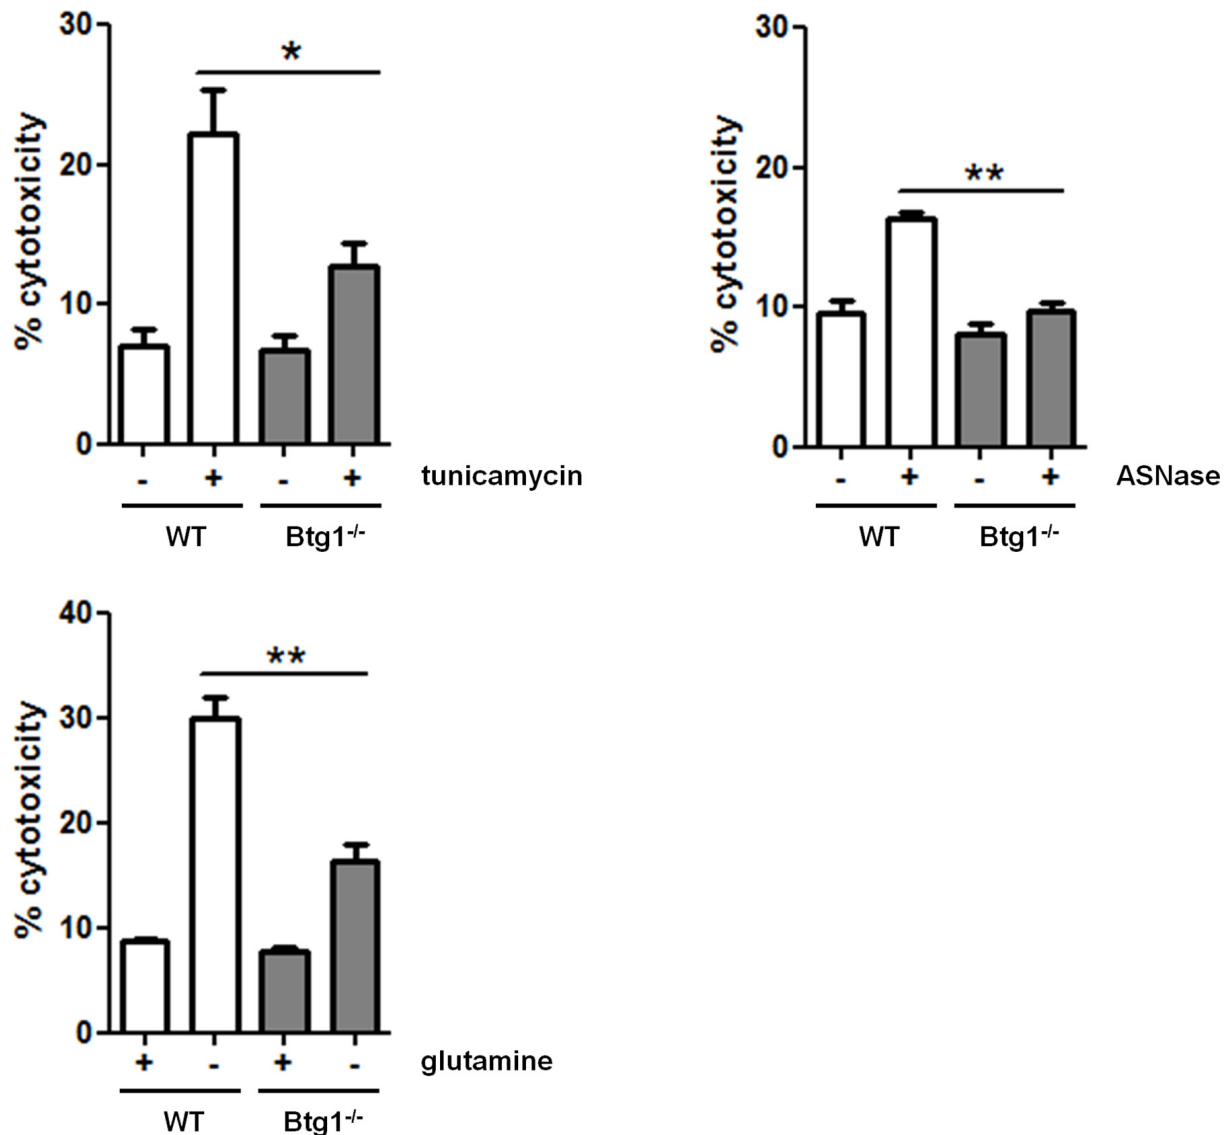

**Supplementary Figure S1: Loss of BTG1 decreases cellular toxicity upon stress treatments.** WT and *Btg1*<sup>-/-</sup> MEFs were treated with indicated stressors and the level of cellular toxicity, as indicated by lactate dehydrogenase (LDH) released into the media from damaged cells, was determined. Bars represent average data from three or four independent experiments  $\pm$  SEM. *P*-values are indicated with \*\**P* < 0.01 and \**P* < 0.05 (two-tailed *t*-test).

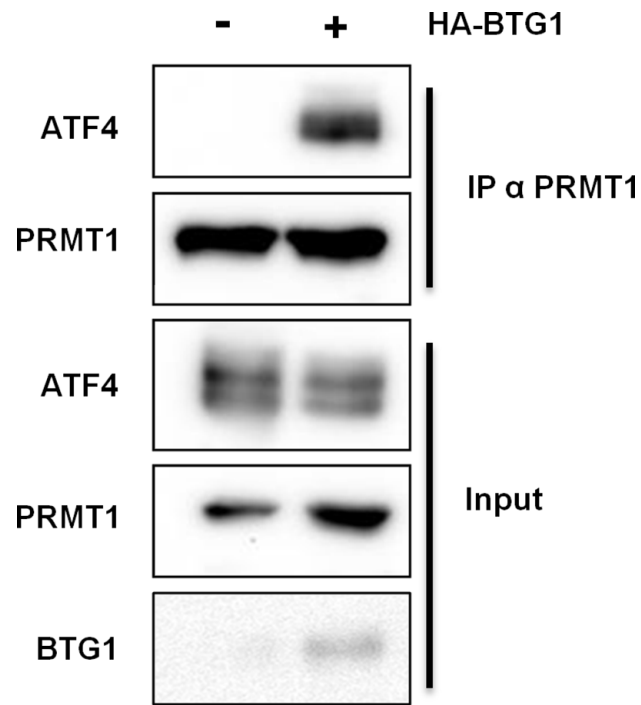

**Supplementary Figure S2: Re-expression of BTG1 in *Btg1*<sup>-/-</sup> cells rescues PRMT1-ATF4 interaction.** Primary *Btg1*<sup>-/-</sup> MEFs were transfected with an expression plasmid encoding HA-BTG1 or with an empty vector control. Cells were treated for 24 hrs with 2 μg/ml tunicamycin to induce expression of endogenous ATF4 and with 5 μM of the proteasome inhibitor MG132 to facilitate detection of the highly unstable BTG1 protein. Protein lysates were generated and subjected to immunoprecipitation (IP) using an anti-PRMT1 antibody. Immunoblot demonstrates expression HA-BTG1 using an anti HA antibody.

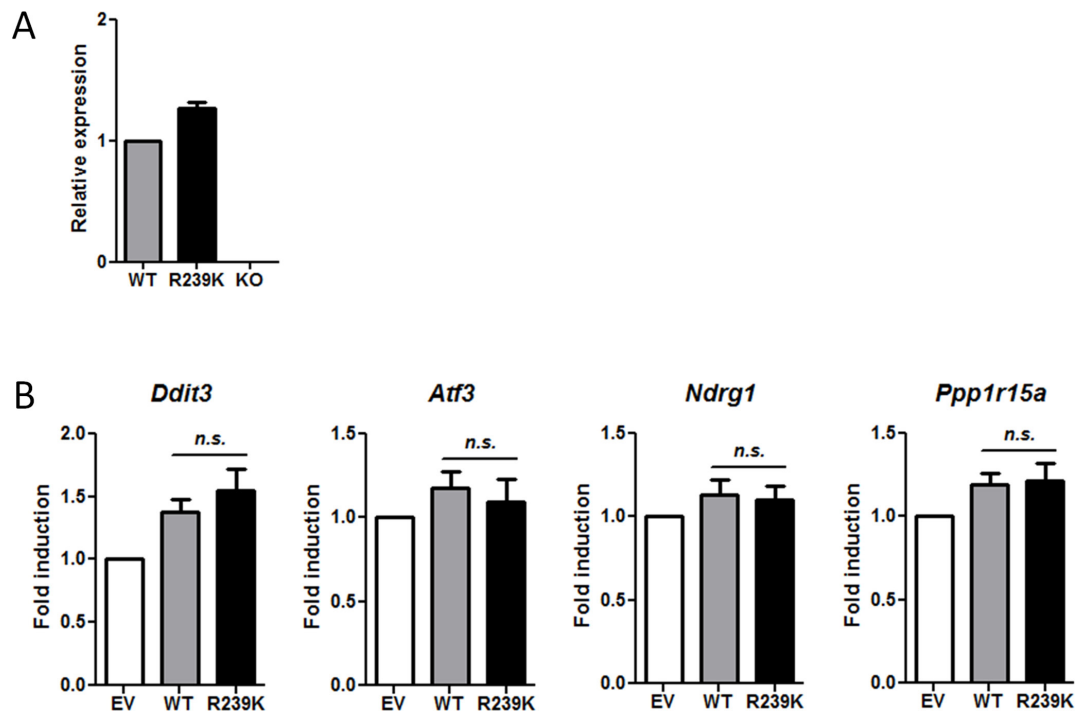

**Supplementary Figure S3: Loss of PRMT1-mediated methylation at residue R239 does not affect the regulation of a subset of ATF4 targets.** (A) Both *ATF4-WT* and *ATF4-R239K* are equally expressed at mRNA level. *ATF4-WT* and *ATF4-R239K* as well as an empty vector control (EV) were retrovirally transduced into immortalized *Atf4*<sup>-/-</sup> MEFs. Cells were subjected to qPCR to measure the ATF4 transcript levels (expression level of WT is set to 1). (B) EV, *ATF4-WT* and *ATF4-R239K* complemented MEFs were subjected to qPCR to measure expression of ATF4 target genes identified by gene expression analysis (Table 3). Data is presented as fold induction of mRNA (expression level of untreated EV MEFs were set to 1). Bars represent average data from four independent experiments  $\pm$  SEM and *P*-values were calculated by two-tailed *t*-test.

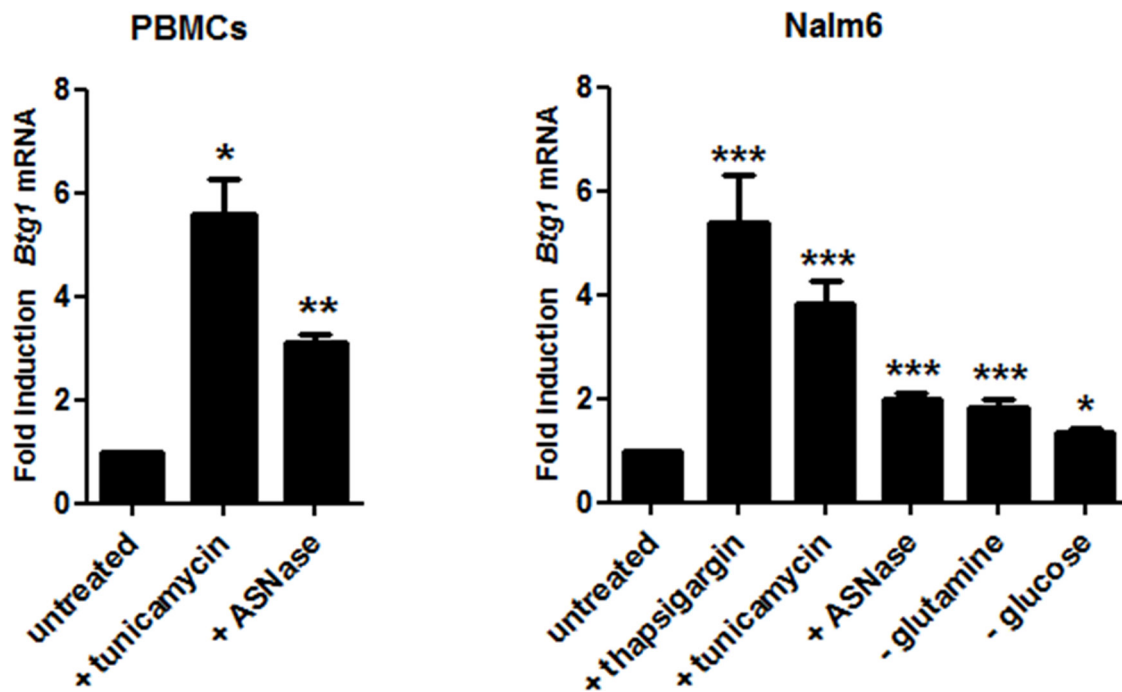

**Supplementary Figure S4: *BTG1* mRNA expression is upregulated in human hematopoietic cells.** Human PBMCs and B-ALL cell lines (Nalm6) were treated with various stressors and *BTG1* mRNA levels relative to untreated cells are shown. Bars represent average data from two (PBMCs) and three (Nalm6) independent experiments  $\pm$  SEM. *P*-values are indicated with \*\*\**P* < 0.001, \*\**P* < 0.01 and \**P* < 0.05 (two-tailed *t*-test).

**Supplementary Table S1: PCR primers used for plasmid constructions**

| Primer            | 5'→3'                                                                |
|-------------------|----------------------------------------------------------------------|
| FLAG-ATF4 fwd     | GCCTCGAGACCATGGACTACAAAGACGATGACGATAAAACCGAAATGAGCTTCCTGAG           |
| FLAG-ATF4 rev     | CGCCTCGAGCTAGGGGACCCTTTTCTTCC                                        |
| HA-BTG1 fwd       | GCGAATTCGACCATGGCTTACCCATACGATGTTCCAGATTACGCTCATCCCTTCTACAC<br>CCGGG |
| HA-BTG1 rev       | GCCTCGAGTTAACCTGATACAGTCATCATATTG                                    |
| GST-EcoRI-ATF4-fw | GCGGAATTCACCATGACCGAAATGAGCTTC                                       |
| ATF4-XhoI-rev     | CGCTCGAGTCACTAGGGGACCCTTTTCTTCCCCCT                                  |
| ATF4 Δ321–351 rev | CGCTCGAGTCACTATAGAGCCTCGTTCTTCTT                                     |
| ATF4 Δ278–351 rev | CGCTCGAGTCACTAGACCTCTTCTATCAAATC                                     |
| R239 + 244K fwd   | CCCCTCTACCAAGGGCTCTCCAAATAAGAGCCTCCC                                 |
| R239 + 244K rev   | GGGAGGCTCTTATTTGGAGAGCCCTTGGTAGAGGGG                                 |
| ATF4 R239K fwd    | CCTCTACCAAGGGCTCTCC                                                  |
| ATF4 R239K rev    | GGAGAGCCCTTGGTAGAGG                                                  |
| ATF4 R244K fwd    | CTCCAAATAAGAGCCTCC                                                   |
| ATF4 R244K rev    | GGAGGCTCTTATTTGGAG                                                   |
| ATF4 R257K fwd    | TCTGCCAAGCCCAAACCTTA                                                 |
| ATF4 R257K rev    | TAAGGTTTGGGCTTGGCAGA                                                 |

**Supplementary Table S2: Primers used for qPCR**

| Primer               | Forward (5'→3')           | Reverse (5'→3')            |
|----------------------|---------------------------|----------------------------|
| <i>mouse primers</i> |                           |                            |
| Ddit3                | CAGAGCCAGAATAACAGCCG      | CCAAGGTGAAAGGCAGGGAC       |
| Atf3                 | GAGGATTTTGCTAACCTGACACC   | TTGACGGTAACTGACTCCAGC      |
| Trb3                 | CCACAGGCACAGAGTACACC      | GATGTAAAGGAGCCGAGAGC       |
| Slc6a9               | AAAAGGTGCCAAAGGGATGTT     | GTCAGTACAAACTCGATCTGGTT    |
| Ndr1                 | ATGTCCCAGAGCTACATGAC      | CCTGCTCCTGAACATCGAACT      |
| Fgf21                | CTGCTGGGGGTCTACCAAG       | CTGCGCTACCACTGTTCC         |
| Ppp1r15a             | GAGGGAC GCCCACAACCTC      | TTACCAGAGACAGGGGTAGGT      |
| Atf4                 | CCTGAACAGCGAAGTGTGG       | TGGAGAACCCATGAGGTTTCAA     |
| Btg1                 | CCACCATGATAGGCGAGATCG     | CTGGGAACCAGTGATGTTTG       |
| Btg2                 | GGGTTTCCTCTCCAGTCTCC      | GATACGGATACAGCGATAGC       |
| Hprt                 | GGGGGCTATAAGTTCTTTGCTGACC | TCCAACACTTCGAGAGGTCCTTTTCA |
| <i>human primers</i> |                           |                            |
| DDIT3                | CCACCATGATAGGCGAGATCG     | CTGGGAACCAGTGATGTTTG       |
| ATF3                 | GGGTTTCCTCTCCAGTCTCC      | GATACGGATACAGCGATAGC       |
| TRB3                 | TGTCTTCGCTGACCGTGAGAGG    | ACGCGTGCTTGTCCCACAGGGA     |
| SLC6A9               | CAGATCGAGTTTGTACTGACGAG   | GCGATAGCAGAGGTATGGGAAG     |
| NDRG1                | CTCCTGCAAGAGTTTGATGTCC    | TCATGCCGATGTCATGGTAGG      |
| FGF21                | GCCTTGAAGCCGGGAGTTATT     | GTGGAGCGATCCATACAGGG       |
| PPP1R15A             | ATGATGGCATGTATGGTGAGC     | AACCTTGCAGTGTCTTATCAG      |
| ATF4                 | CCTCCGAATGGCTGGCTGTGGA    | CAGGGCATCCAAGTCGAACTCC     |
| BTG1                 | AGCGGATTGGACTGAGCAG       | GGTGTGTTTTGAGTGCTACC       |
| TBP                  | GCACAGGAGCCAAGAGTGAA      | ACATCACAGCTCCCCACCAT       |

**Supplementary Table S3: qPCR primers for ChIP assay**

| <b>Primer</b>             | <b>Forward (5'→ 3')</b>  | <b>Reverse (5'→ 3')</b>  |
|---------------------------|--------------------------|--------------------------|
| <i>upstream primers</i>   |                          |                          |
| Ddit3                     | GGGCAGACAAGTTCAGGAAG     | ATGATGCAATGTTTGGCAAC     |
| Atf3                      | GGTCTCCACCCACCTTTTG      | CTCGCTGAGTGAGACTGTGG     |
| Fgf21                     | ACTAAGGTGAAGATCCCAACCTCC | TCCCACCTCCTGACGCGTGATATT |
| Albumin                   | TGCCATTGGGTTAGAGAAATG    | TGGAAGAAGACCTTGTCTCTGA   |
| <i>downstream primers</i> |                          |                          |
| Ddit3                     | AAAAACAAAAGCAGGGCAGA     | TCCTAAAGATACCGGCATGG     |
| Atf3                      | GACCAGGTTCCCAGAGTGAA     | TACCTGGCACCCCTCATAGA     |
| Fgf21                     | TTCTGGGAACCTCACAGCTCAACT | GCTGCCTTGGAATCACCCAAACTT |
